# Supplementary material
Source: Springer Nature journal article supplement (https://www.springermedizin.de/resource/supplementary/13223_2010_97_MOESM3_ESM.pdf/9597188)

A

B

Normal

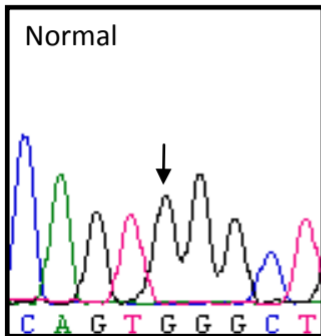

Patient

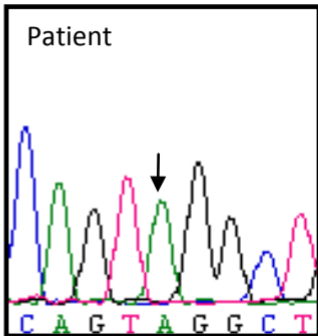

Supplement: MOESM3 [file 9597188]
